# Supplementary material for: What Motivates Innovative Entrepreneurs? Evidence from a Global Field Experiment
Source: Atypon-hosted journal article supplement (doi:10.1287/mnsc.2020.3612), 2020-05-12

Online Appendix To:  
What Motivates Innovative Entrepreneurs?  
Evidence from a Global Field Experiment

Jorge Guzman

Columbia University\*

Jean Joohyun Oh

Columbia University†

Ananya Sen

Carnegie Mellon University‡

---

\*jorge.guzman@columbia.edu. Uris Hall. 3022 Broadway, New York, NY. 10027

†jean.oh@columbia.edu Uris Hall. 3022 Broadway, New York, NY. 10027

‡ananyase@andrew.cmu.edu. Hamburg Hall. 4800 Forbes Avenue, Pittsburgh, PA. 15217.

Table A1: Balance Test For Each Experimental Sample

(a) Balance Test for the IIC Mailing List Sample

| Variable         | (1) Money |      | (2) Social |      | (3) Neutral |      | (1)-(2) | (1)-(3) | (2)-(3) |
|------------------|-----------|------|------------|------|-------------|------|---------|---------|---------|
|                  | Mean      | SD   | Mean       | SD   | Mean        | SD   |         |         |         |
| Female           | 0.33      | 0.47 | 0.34       | 0.47 | 0.33        | 0.47 | 0.67    | 0.66    | 0.39    |
| Altruism         | 0.18      | 0.28 | 0.19       | 0.27 | 0.19        | 0.27 | 0.91    | 0.56    | 0.63    |
| U.S.             | 0.66      | 0.47 | 0.67       | 0.47 | 0.66        | 0.47 | 0.85    | 0.57    | 0.46    |
| Age 18-34        | 0.55      | 0.50 | 0.56       | 0.50 | 0.54        | 0.50 | 0.65    | 0.47    | 0.24    |
| Age 35-54        | 0.24      | 0.43 | 0.24       | 0.43 | 0.25        | 0.43 | 0.96    | 0.46    | 0.43    |
| Age 55-          | 0.17      | 0.38 | 0.17       | 0.37 | 0.17        | 0.38 | 0.60    | 0.84    | 0.74    |
| Ever Opened      | 0.84      | 0.37 | 0.85       | 0.36 | 0.83        | 0.37 | 0.40    | 0.70    | 0.22    |
| Ever Clicked     | 0.44      | 0.50 | 0.45       | 0.50 | 0.45        | 0.50 | 0.73    | 0.85    | 0.88    |
| Prior Registrant | 0.27      | 0.45 | 0.27       | 0.44 | 0.27        | 0.44 | 0.59    | 0.56    | 0.96    |
| Prior Applicant  | 0.10      | 0.30 | 0.10       | 0.30 | 0.09        | 0.29 | 0.97    | 0.42    | 0.40    |
| N                | 2969      |      | 2959       |      | 2950        |      |         |         |         |

(b) Balance Test for Dunn & Bradstreet Sample

| Variable                                     | (1) Money |    | (2) Social |      | (3) Neutral |      | (1)-(2) | (1)-(3) | (2)-(3) |         |      |
|----------------------------------------------|-----------|----|------------|------|-------------|------|---------|---------|---------|---------|------|
|                                              | Mean      | SD | Mean       | SD   | Mean        | SD   |         |         |         | P-value |      |
| Female                                       |           |    | 0.21       | 0.41 | 0.22        | 0.41 | 0.19    | 0.39    | 0.79    | 0.38    | 0.20 |
| Altruism                                     |           |    | 0.46       | 0.24 | 0.44        | 0.25 | 0.45    | 0.23    | 0.17    | 0.72    | 0.11 |
| Title - CTO, CIO                             |           |    | 0.12       | 0.33 | 0.11        | 0.31 | 0.12    | 0.33    | 0.57    | 0.71    | 0.38 |
| Revenue (USD Mil)                            |           |    | 0.28       | 0.34 | 0.27        | 0.33 | 0.28    | 0.35    | 0.62    | 0.66    | 0.30 |
| # of Employees                               |           |    | 5.01       | 5.52 | 5.05        | 5.55 | 4.94    | 5.03    | 0.85    | 0.73    | 0.65 |
| State - CA                                   |           |    | 0.27       | 0.45 | 0.29        | 0.45 | 0.30    | 0.46    | 0.42    | 0.21    | 0.41 |
| NAICS - Manufacturing                        |           |    | 0.15       | 0.36 | 0.16        | 0.37 | 0.16    | 0.36    | 0.38    | 0.68    | 0.60 |
| NAICS - Information                          |           |    | 0.14       | 0.34 | 0.13        | 0.33 | 0.14    | 0.35    | 0.45    | 0.71    | 0.24 |
| NAICS - Professional, Science, Tech Services |           |    | 0.65       | 0.48 | 0.64        | 0.48 | 0.62    | 0.49    | 0.67    | 0.20    | 0.25 |
| N                                            |           |    | 1193       |      | 1200        |      | 1240    |         |         |         |      |

(c) Balance Test for Dunn & Bradstreet Extended Sample

| Variable                                     | (1) Money |    | (2) Social |      | (3) Neutral |      | (1)-(2) | (1)-(3) | (2)-(3) |         |      |
|----------------------------------------------|-----------|----|------------|------|-------------|------|---------|---------|---------|---------|------|
|                                              | Mean      | SD | Mean       | SD   | Mean        | SD   |         |         |         | P-value |      |
| Female                                       |           |    | 0.23       | 0.42 | 0.23        | 0.42 | 0.22    | 0.41    | 0.75    | 0.36    | 0.22 |
| Altruism                                     |           |    | 0.45       | 0.24 | 0.45        | 0.25 | 0.45    | 0.25    | 0.46    | 0.92    | 0.52 |
| Title - Founder                              |           |    | 0.29       | 0.45 | 0.29        | 0.45 | 0.29    | 0.45    | 0.97    | 0.60    | 0.57 |
| Title - CEO                                  |           |    | 0.38       | 0.49 | 0.38        | 0.49 | 0.37    | 0.48    | 0.83    | 0.51    | 0.38 |
| Title - CTO, COO, CIO                        |           |    | 0.09       | 0.29 | 0.09        | 0.28 | 0.08    | 0.28    | 0.37    | 0.18    | 0.65 |
| Revenue (USD Mil)                            |           |    | 0.24       | 0.31 | 0.24        | 0.31 | 0.25    | 0.32    | 0.72    | 0.41    | 0.24 |
| # of Employees                               |           |    | 4.81       | 4.98 | 4.88        | 5.13 | 4.99    | 5.32    | 0.59    | 0.16    | 0.39 |
| State - CA                                   |           |    | 0.18       | 0.39 | 0.18        | 0.39 | 0.19    | 0.39    | 0.93    | 0.74    | 0.67 |
| Type - Nonprofit                             |           |    | 0.02       | 0.14 | 0.03        | 0.16 | 0.03    | 0.16    | 0.25    | 0.25    | 0.99 |
| Type - Partnership                           |           |    | 0.02       | 0.14 | 0.02        | 0.15 | 0.02    | 0.14    | 0.21    | 1.00    | 0.21 |
| NAICS - Professional, Science, Tech Services |           |    | 0.25       | 0.43 | 0.25        | 0.43 | 0.24    | 0.43    | 1.00    | 0.78    | 0.78 |
| NAICS - Finance, Insurance                   |           |    | 0.07       | 0.26 | 0.07        | 0.26 | 0.07    | 0.26    | 0.65    | 0.61    | 0.95 |
| NAICS - Manufacturing                        |           |    | 0.06       | 0.23 | 0.06        | 0.25 | 0.06    | 0.24    | 0.23    | 0.41    | 0.70 |
| NAICS - Information                          |           |    | 0.05       | 0.22 | 0.05        | 0.21 | 0.05    | 0.23    | 0.48    | 0.63    | 0.23 |
| N                                            |           |    | 3268       |      | 3277        |      | 3271    |         |         |         |      |

Table A1: Balance Test For Each Experimental Sample (Continued)

## (d) Balance Test for AngelList Newsletter Sample

| Variable           | (1) Money |      | (2) Social |      | (3) Neutral |      | (1)-(2) | (1)-(3) | (2)-(3) |
|--------------------|-----------|------|------------|------|-------------|------|---------|---------|---------|
|                    | Mean      | SD   | Mean       | SD   | Mean        | SD   |         |         |         |
| Altruism           | 0.18      | 0.30 | 0.21       | 0.28 | 0.20        | 0.29 | 0.12    | 0.39    | 0.49    |
| North America & EU | 0.80      | 0.40 | 0.76       | 0.43 | 0.79        | 0.41 | 0.17    | 0.73    | 0.30    |
| Days to Click      | 0.46      | 0.73 | 0.44       | 0.70 | 0.47        | 0.76 | 0.59    | 0.95    | 0.55    |
| Device - Apple     | 0.55      | 0.50 | 0.54       | 0.50 | 0.59        | 0.49 | 0.83    | 0.19    | 0.12    |
| Device - Desktop   | 0.51      | 0.50 | 0.50       | 0.50 | 0.51        | 0.50 | 0.83    | 1.00    | 0.83    |
| N                  | 388       |      | 410        |      | 398         |      |         |         |         |

## (e) Balance Test for Application Stage Sample

| Variable                                                   | (1) Money |    | (2) Social |        | (3) Neutral |      | (1)-(2) | (1)-(3) | (2)-(3) |         |      |
|------------------------------------------------------------|-----------|----|------------|--------|-------------|------|---------|---------|---------|---------|------|
|                                                            | Mean      | SD | Mean       | SD     | Mean        | SD   |         |         |         | P-value |      |
| Female                                                     |           |    | 0.21       | 0.41   | 0.25        | 0.43 | 0.26    | 0.44    | 0.23    | 0.19    | 0.88 |
| Altruism                                                   |           |    | -0.05      | 0.38   | -0.05       | 0.35 | -0.07   | 0.35    | 0.96    | 0.40    | 0.39 |
| Region - Africa                                            |           |    | 0.35       | 0.48   | 0.41        | 0.49 | 0.42    | 0.49    | 0.13    | 0.13    | 0.95 |
| Region - Asia                                              |           |    | 0.21       | 0.41   | 0.17        | 0.38 | 0.20    | 0.40    | 0.25    | 0.69    | 0.46 |
| Region - Europe                                            |           |    | 0.09       | 0.29   | 0.09        | 0.28 | 0.10    | 0.30    | 0.92    | 0.61    | 0.52 |
| Region - Latin America                                     |           |    | 0.16       | 0.37   | 0.15        | 0.36 | 0.14    | 0.35    | 0.78    | 0.51    | 0.69 |
| Region - US & Canada                                       |           |    | 0.14       | 0.35   | 0.15        | 0.36 | 0.14    | 0.34    | 0.75    | 0.76    | 0.52 |
| Application % Completed                                    |           |    | 0.16       | 0.31   | 0.12        | 0.28 | 0.16    | 0.32    | 0.19    | 0.97    | 0.20 |
| Award Category - Financial Inclusion                       |           |    | 0.18       | 0.38   | 0.17        | 0.37 | 0.19    | 0.39    | 0.72    | 0.81    | 0.54 |
| Award Category - income Growth & Job Creation              |           |    | 0.29       | 0.45   | 0.32        | 0.47 | 0.29    | 0.45    | 0.52    | 0.91    | 0.45 |
| Award Category - Skills Development & Opportunity Matching |           |    | 0.30       | 0.46   | 0.34        | 0.47 | 0.29    | 0.45    | 0.36    | 0.70    | 0.19 |
| Award Category - Technology Access                         |           |    | 0.22       | 0.42   | 0.18        | 0.38 | 0.23    | 0.42    | 0.14    | 0.83    | 0.09 |
| For-Profit                                                 |           |    | 0.90       | 0.31   | 0.87        | 0.33 | 0.89    | 0.32    | 0.37    | 0.72    | 0.59 |
| Log(# of Female Employees)                                 |           |    | 0.86       | 1.36   | 0.93        | 0.60 | 0.87    | 0.56    | 0.48    | 0.99    | 0.19 |
| Revenue (USD Mil)                                          |           |    | 32.48      | 533.76 | 0.36        | 2.77 | 0.17    | 1.02    | 0.32    | 0.32    | 0.26 |
| Any Employee Over Age 60                                   |           |    | 0.12       | 0.33   | 0.16        | 0.37 | 0.12    | 0.33    | 0.16    | 0.95    | 0.18 |
| Serves Indigenous Population                               |           |    | 0.48       | 0.50   | 0.48        | 0.50 | 0.46    | 0.50    | 0.99    | 0.62    | 0.62 |
| N                                                          |           |    | 277        |        | 319         |      | 281     |         |         |         |      |

Table A2: Altruism and Development Indicators

| VARIABLES                         | (1)                  | (2)                 | (3)                  | (4)                   | (5)                 |
|-----------------------------------|----------------------|---------------------|----------------------|-----------------------|---------------------|
|                                   | Altruism             | Altruism            | Altruism             | Altruism              | Altruism            |
| Female education                  | 0.00144<br>(0.00877) |                     |                      |                       |                     |
| Log GDP Per Capita                |                      | 0.00105<br>(0.0163) |                      |                       |                     |
| Gini Coefficient                  |                      |                     | 0.00250<br>(0.00586) |                       |                     |
| Labor Force Participation         |                      |                     |                      | -0.00301<br>(0.00388) |                     |
| Log Health Expenditure Per Capita |                      |                     |                      |                       | -0.0068<br>(0.0254) |
| Observations                      | 41                   | 75                  | 68                   | 76                    | 76                  |
| R-squared                         | 0.001                | 0.000               | 0.003                | 0.008                 | 0.001               |

Standard errors in parentheses. \*\*\*  $p < 0.01$ , \*\*  $p < 0.05$ , \*  $p < 0.1$ . The empirical model is a bivariate OLS with country level altruism as the dependent variable. The unit of observation is at the country level.

Table A3: Application Round – Robustness and Alternative Measure

| VARIABLES        | (1)<br>(Probit)<br>Has Applied | (2)<br>(OLS)<br>Has Applied | (3)<br>(Threshold 1)<br>Has Applied | (4)<br>(Threshold 2)<br>Has Applied | (5)<br>(Threshold 3)<br>Has Applied |
|------------------|--------------------------------|-----------------------------|-------------------------------------|-------------------------------------|-------------------------------------|
| Money            | 0.410***<br>(0.158)            | 0.147**<br>(0.0576)         | 0.924***<br>(0.289)                 | 0.856***<br>(0.290)                 | 0.806***<br>(0.283)                 |
| Neutral          | 0.373***<br>(0.124)            | 0.133***<br>(0.0446)        | 0.711***<br>(0.263)                 | 0.663**<br>(0.268)                  | 0.635**<br>(0.256)                  |
| Female           | 0.680***<br>(0.207)            | 0.250***<br>(0.0799)        | 1.175***<br>(0.441)                 | 1.075**<br>(0.443)                  | 1.074**<br>(0.425)                  |
| Female x Money   | -0.585**<br>(0.290)            | -0.213*<br>(0.114)          | -1.115**<br>(0.560)                 | -1.009*<br>(0.559)                  | -0.966*<br>(0.530)                  |
| Female x Neutral | -0.621**<br>(0.242)            | -0.229**<br>(0.0938)        | -0.954*<br>(0.525)                  | -0.936*<br>(0.519)                  | -0.882*<br>(0.520)                  |
| Observations     | 802                            | 802                         | 647                                 | 668                                 | 685                                 |

Robust standard errors in parentheses clustered by registration date. \*\*\*  $p < 0.01$ , \*\*  $p < 0.05$ , \*  $p < 0.1$ . The empirical model is a Probit in (1), OLS in (2) and Logit in (3)-(5) with whether the company has applied as the dependent variable. We control for which category they are registered in, whether they for profit, number of female employees and revenue. Columns (1) and (2) are alternate specifications for the baseline application experiment results. Columns (3)-(5) use the Stata 'strdist' measure to match CEO names using 3 thresholds (distance of less than 5,6 and 7).

Table A4: Application Round – Robustness and Alternative Measure

| VARIABLES                 | (1)<br>(Probit)<br>Has Applied | (2)<br>(OLS)<br>Has Applied | (3)<br>(Threshold 1)<br>Has Applied | (4)<br>(Threshold 2)<br>Has Applied | (5)<br>(Threshold 3)<br>Has Applied |
|---------------------------|--------------------------------|-----------------------------|-------------------------------------|-------------------------------------|-------------------------------------|
| Money                     | 0.167<br>(0.121)               | 0.0607<br>(0.0455)          | 0.545**<br>(0.223)                  | 0.492**<br>(0.230)                  | 0.435*<br>(0.226)                   |
| Neutral                   | 0.189*<br>(0.113)              | 0.0686<br>(0.0430)          | 0.457**<br>(0.215)                  | 0.403*<br>(0.224)                   | 0.386*<br>(0.213)                   |
| Altruism                  | 0.596**<br>(0.242)             | 0.211**<br>(0.0861)         | 0.907*<br>(0.491)                   | 0.782<br>(0.506)                    | 0.805*<br>(0.471)                   |
| Altruism $\times$ Money   | -0.862**<br>(0.350)            | -0.312**<br>(0.128)         | -1.449**<br>(0.678)                 | -1.351*<br>(0.698)                  | -1.348**<br>(0.670)                 |
| Altruism $\times$ Neutral | -0.397<br>(0.306)              | -0.136<br>(0.113)           | -0.407<br>(0.667)                   | -0.223<br>(0.676)                   | -0.358<br>(0.627)                   |
| Observations              | 711                            | 711                         | 575                                 | 591                                 | 604                                 |

Robust standard errors in parentheses clustered by registration date. \*\*\*  $p < 0.01$ , \*\*  $p < 0.05$ , \*  $p < 0.1$ . The empirical model is a Probit in (1), OLS in (2) and Logit in (3)-(5) with whether the company has applied as the dependent variable. We control for which category they are registered in, whether they for profit, number of female employees and revenue. Columns (1) and (2) are alternate specifications for the baseline application experiment results. Columns (3)-(5) use the Stata 'strdist' measure to match CEO names using 3 thresholds (distance of less than 5,6 and 7).

Table A5: Robustness Check – Controlling for Gender in Altruism Specifications and Vice Versa

| VARIABLES          | Registration E-mail  | Registration E-mail  | Registration E-mail  | Registration E-mail  | Application Stage   | Application Stage   |
|--------------------|----------------------|----------------------|----------------------|----------------------|---------------------|---------------------|
|                    | (1)                  | (2)                  | (3)                  | (4)                  | (5)                 | (6)                 |
|                    | Total Clicks         | Total Clicks         | Website Clicks       | Website Clicks       | Applied to IIC      | Applied to IIC      |
| Money              | 0.494***<br>(0.149)  | 0.491***<br>(0.155)  | 0.433*<br>(0.221)    | 0.388***<br>(0.150)  | 0.595**<br>(0.265)  | 0.281<br>(0.199)    |
| Neutral            | 0.194*<br>(0.107)    | 0.116<br>(0.161)     | 0.0928<br>(0.141)    | -0.0577<br>(0.187)   | 0.560***<br>(0.211) | 0.302<br>(0.185)    |
| Female             | 0.358***<br>(0.110)  | -0.0375<br>(0.0942)  | 0.420***<br>(0.120)  | -0.0154<br>(0.147)   | 1.004***<br>(0.379) | 0.394**<br>(0.186)  |
| Female x Money     | -0.748***<br>(0.193) |                      | -0.756***<br>(0.267) |                      | -0.999**<br>(0.505) |                     |
| Female x Neutral   | -0.486**<br>(0.207)  |                      | -0.654***<br>(0.223) |                      | -0.904**<br>(0.432) |                     |
| Altruism           | -0.422<br>(0.698)    | 0.764<br>(0.787)     | -0.695<br>(0.755)    | 0.631<br>(0.824)     | 0.235<br>(0.178)    | 0.970**<br>(0.398)  |
| Altruism x Money   |                      | -2.186***<br>(0.275) |                      | -2.450***<br>(0.281) |                     | -1.422**<br>(0.565) |
| Altruism x Neutral |                      | -0.678<br>(0.814)    |                      | -0.585<br>(1.066)    |                     | -0.693<br>(0.526)   |
| Observations       | 10,950               | 10,950               | 10,950               | 10,950               | 711                 | 711                 |

Robust standard errors in parentheses clustered by country. \*\*\*  $p < 0.01$ , \*\*  $p < 0.05$ , \*  $p < 0.1$ . Columns (1)-(4) refer to the IIC and Dunn and Bradstreet sample that corresponds to the registration e-mail sample. Columns (5)-(6) consists of the application stage sample. We use the Poisson QMLE model in (1)-(4) and a Logit model in (5)-(6). The unit of observation is the individual recipient. In (1)-(4) controls include a dummy indicating whether the recipient was in the IIC or Dunn and Bradstreet list, whether the recipient was a registrant or applicant to the IIC in prior years, and the 'member rating' assigned by marketing tool based on prior activity. In column (5) and (6) we control for which category they are registered in, whether they are for-profit, whether any employees over age 60, whether they serve marginalized populations and number of female employees (log).

Table A6: Robustness Check – Controlling for GDP Per Capita

| VARIABLES           | Registration E-mail  | Registration E-mail  | Registration E-mail  | Registration E-mail  | AngelList Sample (First Session) | AngelList Sample (All Sessions) | Application Stage    | Application Stage   |
|---------------------|----------------------|----------------------|----------------------|----------------------|----------------------------------|---------------------------------|----------------------|---------------------|
|                     | (1)                  | (2)                  | (3)                  | (4)                  | (5)                              | (6)                             | (7)                  | (8)                 |
|                     | Total Clicks         | Total Clicks         | Website Clicks       | Website Clicks       | Time Spent (first visit)         | Time Spent (all visits)         | Applied to IIC       | Applied to IIC      |
| Money               | 0.451***<br>(0.153)  | 0.493***<br>(0.150)  | 0.386*<br>(0.226)    | 0.387***<br>(0.142)  | 13.45<br>(11.53)                 | 250.1*<br>(137.2)               | 0.655**<br>(0.263)   | 0.269<br>(0.202)    |
| Neutral             | 0.132<br>(0.116)     | 0.109<br>(0.159)     | 0.0247<br>(0.135)    | -0.0681<br>(0.184)   | 8.369<br>(9.372)                 | -32.51<br>(60.83)               | 0.646***<br>(0.212)  | 0.268<br>(0.181)    |
| Female              | 0.333***<br>(0.127)  |                      | 0.392***<br>(0.142)  |                      |                                  |                                 | 1.123***<br>(0.353)  |                     |
| Female x Money      | -0.754***<br>(0.204) |                      | -0.763***<br>(0.281) |                      |                                  |                                 | -0.951**<br>(0.482)  |                     |
| Female x Neutral    | -0.446**<br>(0.227)  |                      | -0.628***<br>(0.235) |                      |                                  |                                 | -1.102***<br>(0.396) |                     |
| Altruism            |                      | 0.784<br>(0.773)     |                      | 0.663<br>(0.798)     | 43.93***<br>(16.13)              | 1,245***<br>(261.6)             |                      | 0.936**<br>(0.413)  |
| Altruism x Money    |                      | -2.173***<br>(0.269) |                      | -2.434***<br>(0.267) | -61.33**<br>(29.64)              | -877.2**<br>(335.2)             |                      | -1.423**<br>(0.579) |
| Altruism x Neutral  |                      | -0.657<br>(0.812)    |                      | -0.556<br>(1.060)    | -63.97***<br>(23.84)             | -1,035***<br>(215.2)            |                      | -0.725<br>(0.519)   |
| log(GDP Per Capita) | 0.0882<br>(0.0768)   | 0.0515<br>(0.0647)   | 0.121<br>(0.0828)    | 0.0727<br>(0.0624)   | 4.113<br>(5.073)                 | 60.94<br>(54.12)                | -0.0272<br>(0.0524)  | -0.0403<br>(0.0635) |
| Observations        | 11,121               | 10,939               | 11,121               | 10,939               | 1,128                            | 1,128                           | 780                  | 706                 |
| R-squared           | -                    | -                    | -                    | -                    | 0.009                            | 0.009                           | -                    | -                   |

Robust standard errors in parentheses clustered by country. \*\*\*  $p < 0.01$ , \*\*  $p < 0.05$ , \*  $p < 0.1$ . Columns (1)-(4) refer to the IIC and Dunn and Bradstreet sample that corresponds to the registration e-mail sample. Columns (5)-(6) consists of the AngelList registration stage sample while (7)-(8) analyzes the application stage sample. The unit of observation is the individual recipient. We use the Poisson QMLE model in (1)-(4), OLS regression in (5)-(6) and a Logit model in (7)-(8). In (1)-(4) controls include a dummy indicating whether the recipient was in the IIC or Dunn and Bradstreet list, whether the recipient was a registrant or applicant to the IIC in prior years, and the ‘member rating’ assigned by marketing tool based on prior activity. In columns (5)-(6), we include date of click fixed effects. In column (7) and (8) we control for which category they are registered in, whether they are for-profit, whether any employees over age 60, whether they serve marginalized populations and number of female employees (log).

Table A7: Robustness Check – Extensive Margin and Alternative Measure of Culture

| VARIABLES                      | Registration E-mail  | Registration E-mail | Registration E-mail  | Registration E-mail  | Registration E-mail  | Application Stage   | Application Stage   | Application Stage   |
|--------------------------------|----------------------|---------------------|----------------------|----------------------|----------------------|---------------------|---------------------|---------------------|
|                                | (1)                  | (2)                 | (3)                  | (4)                  | (5)                  | (6)                 | (7)                 | (8)                 |
|                                | Has Clicked          | Has Clicked         | Total Clicks         | Total Clicks         | Total Clicks         | Has Applied         | Has Applied         | Has Applied         |
| Money                          | 0.310<br>(0.212)     | 0.367**<br>(0.156)  | 0.186*<br>(0.0977)   | 0.184*<br>(0.100)    | 0.185*<br>(0.0985)   | 0.180<br>(0.197)    | 0.180<br>(0.197)    | 0.172<br>(0.201)    |
| Neutral                        | 0.136<br>(0.108)     | 0.0950<br>(0.104)   | 0.0142<br>(0.0918)   | 0.0129<br>(0.0920)   | 0.00940<br>(0.0912)  | 0.267<br>(0.213)    | 0.277<br>(0.207)    | 0.225<br>(0.203)    |
| Female                         | 0.205<br>(0.157)     |                     |                      | -0.0390<br>(0.0940)  | -0.0398<br>(0.0949)  | 0.390**<br>(0.179)  |                     |                     |
| Female x Money                 | -0.497***<br>(0.140) |                     |                      |                      |                      |                     |                     |                     |
| Female x Neutral               | -0.435***<br>(0.166) |                     |                      |                      |                      |                     |                     |                     |
| Altruism                       |                      | 0.600<br>(0.550)    |                      |                      |                      |                     |                     |                     |
| Altruism x Money               |                      | -0.700**<br>(0.354) |                      |                      |                      |                     |                     |                     |
| Altruism x Neutral             |                      | -0.414<br>(0.400)   |                      |                      |                      |                     |                     |                     |
| Positive Reciprocity           |                      |                     | 0.286<br>(1.034)     | 0.287<br>(1.029)     | 0.300<br>(1.021)     | 0.917**<br>(0.373)  | 0.942**<br>(0.388)  | 0.907**<br>(0.392)  |
| Positive Reciprocity x Money   |                      |                     | -2.019***<br>(0.619) | -2.017***<br>(0.620) | -2.000***<br>(0.613) | -0.978**<br>(0.473) | -0.969**<br>(0.475) | -0.971**<br>(0.477) |
| Positive Reciprocity x Neutral |                      |                     | -0.223<br>(1.250)    | -0.223<br>(1.245)    | -0.208<br>(1.238)    | -0.396<br>(0.512)   | -0.399<br>(0.509)   | -0.463<br>(0.504)   |
| Log(GDP Per Capita)            |                      |                     |                      |                      | 0.0326<br>(0.0573)   |                     |                     | -0.0278<br>(0.0553) |
| Observations                   | 12,511               | 10,950              | 10,950               | 10,950               | 10,939               | 711                 | 711                 | 706                 |

Robust standard errors in parentheses clustered by country. \*\*\*  $p < 0.01$ , \*\*  $p < 0.05$ , \*  $p < 0.1$ . Columns (1)-(2) tests the extensive margin using the dependent variable of whether the recipient clicked on an email link. Columns (3)-(8) use positive reciprocity, instead of altruism, as an alternative measure of a prosocial culture. Columns (1)-(5s) use the IIC and Dunn and Bradstreet sample that corresponds to the registration e-mail sample. Column (6)-(8) consists of the application stage sample. The unit of observation is the individual recipient. We use Logit models in Columns (1)-(2), a Poisson QMLE model in (3)-(5), and a Logit model in (6)-(8). In Columns (1)-(5), controls include a dummy indicating whether the recipient was in the IIC or Dunn and Bradstreet list, whether the recipient was a registrant or applicant to the IIC in prior years, and the ‘member rating’ assigned by marketing tool based on prior activity. In columns (6)-(8) we control for which category they are registered in, whether they are for-profit, whether any employees over age 60, whether they serve marginalized populations and number of female employees (log). Columns (4) and (7) also control for whether the recipient is female while columns (5) and (8) control for the GDP Per Capital of the country.

Table A8: Gender Differences in Observables across Samples

| Variable                   | (1) Male |        | (2) Female |       | (1)-(2) |              |
|----------------------------|----------|--------|------------|-------|---------|--------------|
|                            | Mean     | SD     | Mean       | SD    | P-value | Observations |
| CIO                        | 0.0098   | 0.0098 | 0.0067     | 0.081 | 0.48    | 3,610        |
| CTO                        | 0.105    | 0.307  | 0.131      | 0.337 | 0.32    | 3,610        |
| New York-California        | 0.18     | 0.38   | 0.168      | 0.37  | 0.97    | 12,511       |
| Click Rate                 | 0.053    | 0.001  | 0.052      | 0.001 | 0.94    | 8,878        |
| Open Rate                  | 0.333    | 0.17   | 0.328      | 0.261 | 0.987   | 8,878        |
| Prior Applicant            | 0.095    | 0.080  | 0.098      | 0.119 | 0.979   | 8,878        |
| Log(Revenue)               | 6.37     | 0.30   | 6.08       | 0.53  | 0.63    | 876          |
| Number of College Educated | 1.54     | 0.10   | 1.48       | 0.17  | 0.74    | 766          |
| Word of Mouth              | 0.46     | 0.04   | 0.49       | 0.08  | 0.75    | 876          |
| Firm Age                   | 0.85     | 0.01   | 0.83       | 0.02  | 0.56    | 876          |
| Number of People Over 60   | 0.148    | 0.01   | 0.10       | 0.02  | 0.11    | 876          |
| Serves Marginalized        | 0.477    | 0.06   | 0.461      | 0.11  | 0.90    | 876          |

This Table looks at differences in observables across male and female entrepreneurs across our samples. The first six characteristics come from the IIC or Dunn and Bradstreet lists (or both if available) in the e-mail registration experiment while the last six are drawn from the application experiment. Standard errors for p-values are clustered at regional level (country or US state) to account for within-region correlations.

Table A9: Registration Round – Robustness with Different D&B Samples

|                    | IIC<br>+             |                      |
|--------------------|----------------------|----------------------|----------------------|----------------------|----------------------|----------------------|----------------------|----------------------|
|                    | D&B Extended Sample  | D&B Extended Sample  | D&B High-Tech Sample | D&B High-Tech Sample | D&B CTO/CIO Sample   | D&B CTO/CIO Sample   | IIC Sample Only      |                      |
| VARIABLES          | (1)                  | (2)                  | (3)                  | (4)                  | (5)                  | (6)                  | (7)                  |                      |
|                    | Total Clicks         |                      |
| Money              | 0.419***<br>(0.135)  | 0.499***<br>(0.135)  | 0.435***<br>(0.137)  | 0.493***<br>(0.153)  | 0.431***<br>(0.143)  | 0.471***<br>(0.166)  | 0.431***<br>(0.143)  | 0.469***<br>(0.166)  |
| Neutral            | 0.206**<br>(0.0978)  | 0.112<br>(0.151)     | 0.172*<br>(0.103)    | 0.118<br>(0.159)     | 0.145<br>(0.109)     | 0.105<br>(0.164)     | 0.145<br>(0.109)     | 0.105<br>(0.164)     |
| Female             | 0.367***<br>(0.107)  |                      | 0.342***<br>(0.111)  |                      | 0.344***<br>(0.112)  |                      | 0.343***<br>(0.111)  |                      |
| Female x Money     | -0.764***<br>(0.229) |                      | -0.815***<br>(0.227) |                      | -0.830***<br>(0.230) |                      | -0.840***<br>(0.230) |                      |
| Female x Neutral   | -0.524***<br>(0.203) |                      | -0.457**<br>(0.203)  |                      | -0.450**<br>(0.204)  |                      | -0.458**<br>(0.207)  |                      |
| Altruism           |                      | 0.706<br>(0.728)     |                      | 0.762<br>(0.788)     |                      | 0.864<br>(0.834)     |                      | 0.872<br>(0.837)     |
| Altruism x Money   |                      | -2.046***<br>(0.269) |                      | -2.192***<br>(0.277) |                      | -2.372***<br>(0.312) |                      | -2.387***<br>(0.315) |
| Altruism x Neutral |                      | -0.525<br>(0.680)    |                      | -0.669<br>(0.814)    |                      | -0.834<br>(0.937)    |                      | -0.849<br>(0.948)    |
| Observations       | 18,693               | 17,132               | 12,258               | 10,697               | 9,311                | 7,750                | 8,878                | 7,317                |

Robust standard errors in parentheses clustered by country. \*\*\*  $p < 0.01$ , \*\*  $p < 0.05$ , \*  $p < 0.1$ . The empirical model is a quasi-maximum likelihood (QMLE) Poisson model predicting the total number of clicks on email links. The unit of observation is the individual recipient. Columns (1)-(2) use the IIC sample and D&B extended sample that includes all industries as well as partnerships and not-for-profits. Columns (3)-(4) use the IIC sample and the D&B sub-sample of high-tech industries – Manufacturing, Information, and Professional, Scientific, and Technical Services – excluding partnerships and not-for-profits. Columns (5)-(6) uses the IIC sample and the D&B sub-sample of CTO or CIO contacts, also excluding partnerships and not-for-profits. Columns (7)-(8) uses the IIC sample only. Controls include a dummy indicating whether the recipient was in the IIC or D&B list, whether the recipient was a registrant or applicant to the IIC in prior years, and the ‘member rating’ assigned by marketing tool based on prior activity. The reduction in observations in columns with interactions with altruism is due to altruism values not being available in the GPS dataset for a few countries.

Figure A1: (a) Screenshot of the IIC's Mission Statement

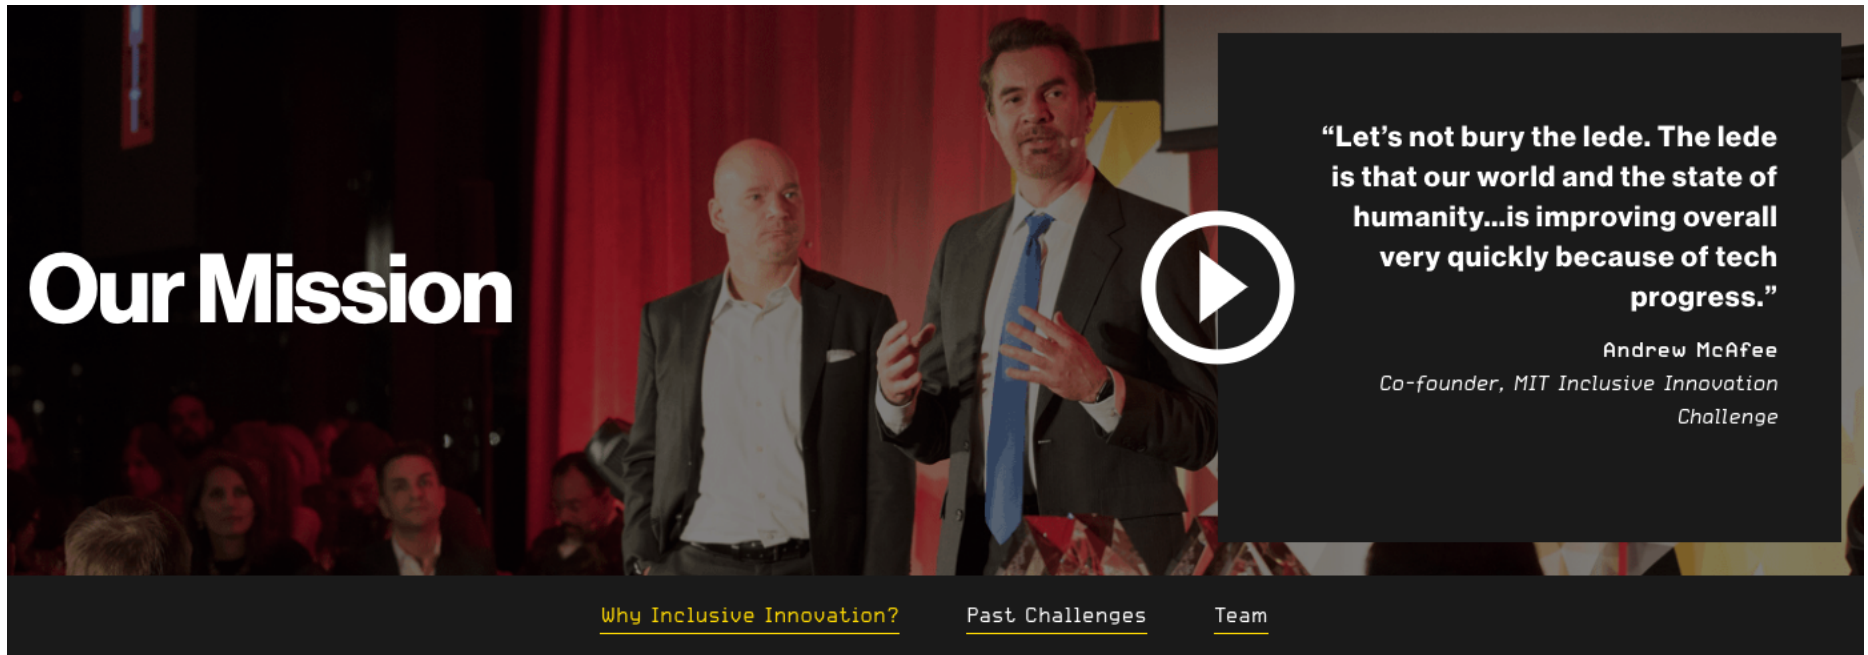

12

## Why Inclusive Innovation?

Technology is the most disruptive force in human history, ushering in a new era of unprecedented health, convenience, and prosperity. Yet many people are not experiencing the benefits of this progress, despite actively seeking to more fully participate in and profit from new educational, financial, and work opportunities.

At MIT, we believe that inclusive innovation - the use of technology to generate increased economic opportunity for moderate and low income earners - is an imperative with a tight deadline. The question we should be asking ourselves at this historic moment isn't "what is technology going to do to our economy and society," but rather "what will we do with technology?"

**Our vision is an economy that works for all. Our mission is to accelerate the success of the changemaking entrepreneurs that are making that vision a reality, and to drive a solutions-oriented conversation about the future of work.**

Figure A1: (b) Screenshot of the IIC's Impact Report

The IIC accelerates innovation-driven entrepreneurship for a more inclusive and prosperous economy.

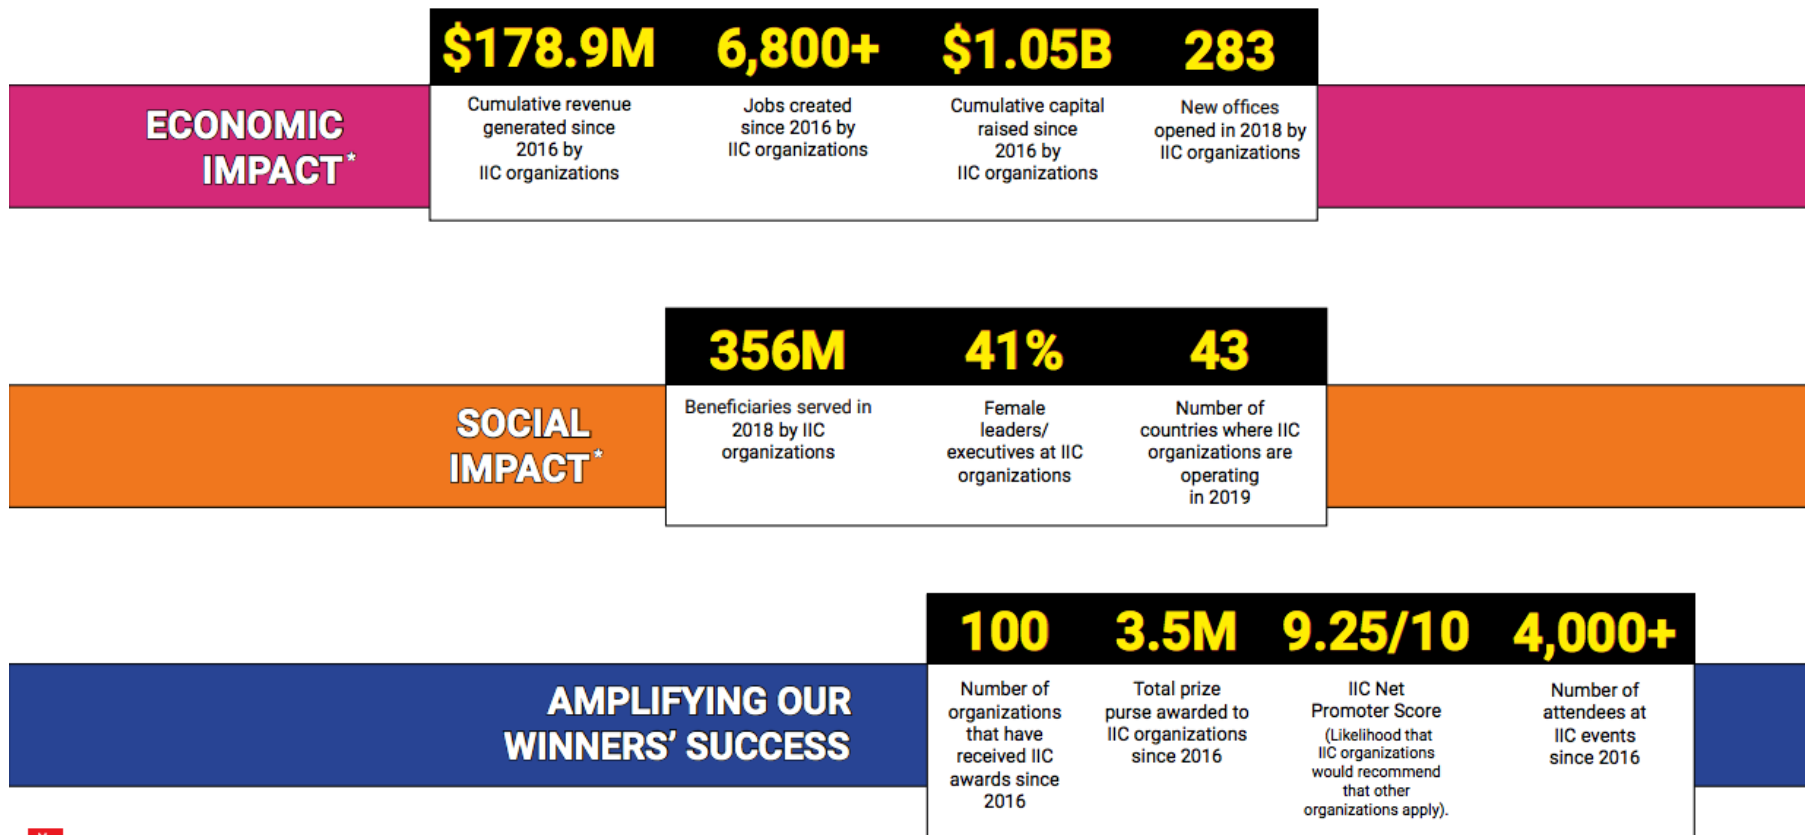

13

Figure A2: (a) Registration Stage Email Templates – Money Treatment

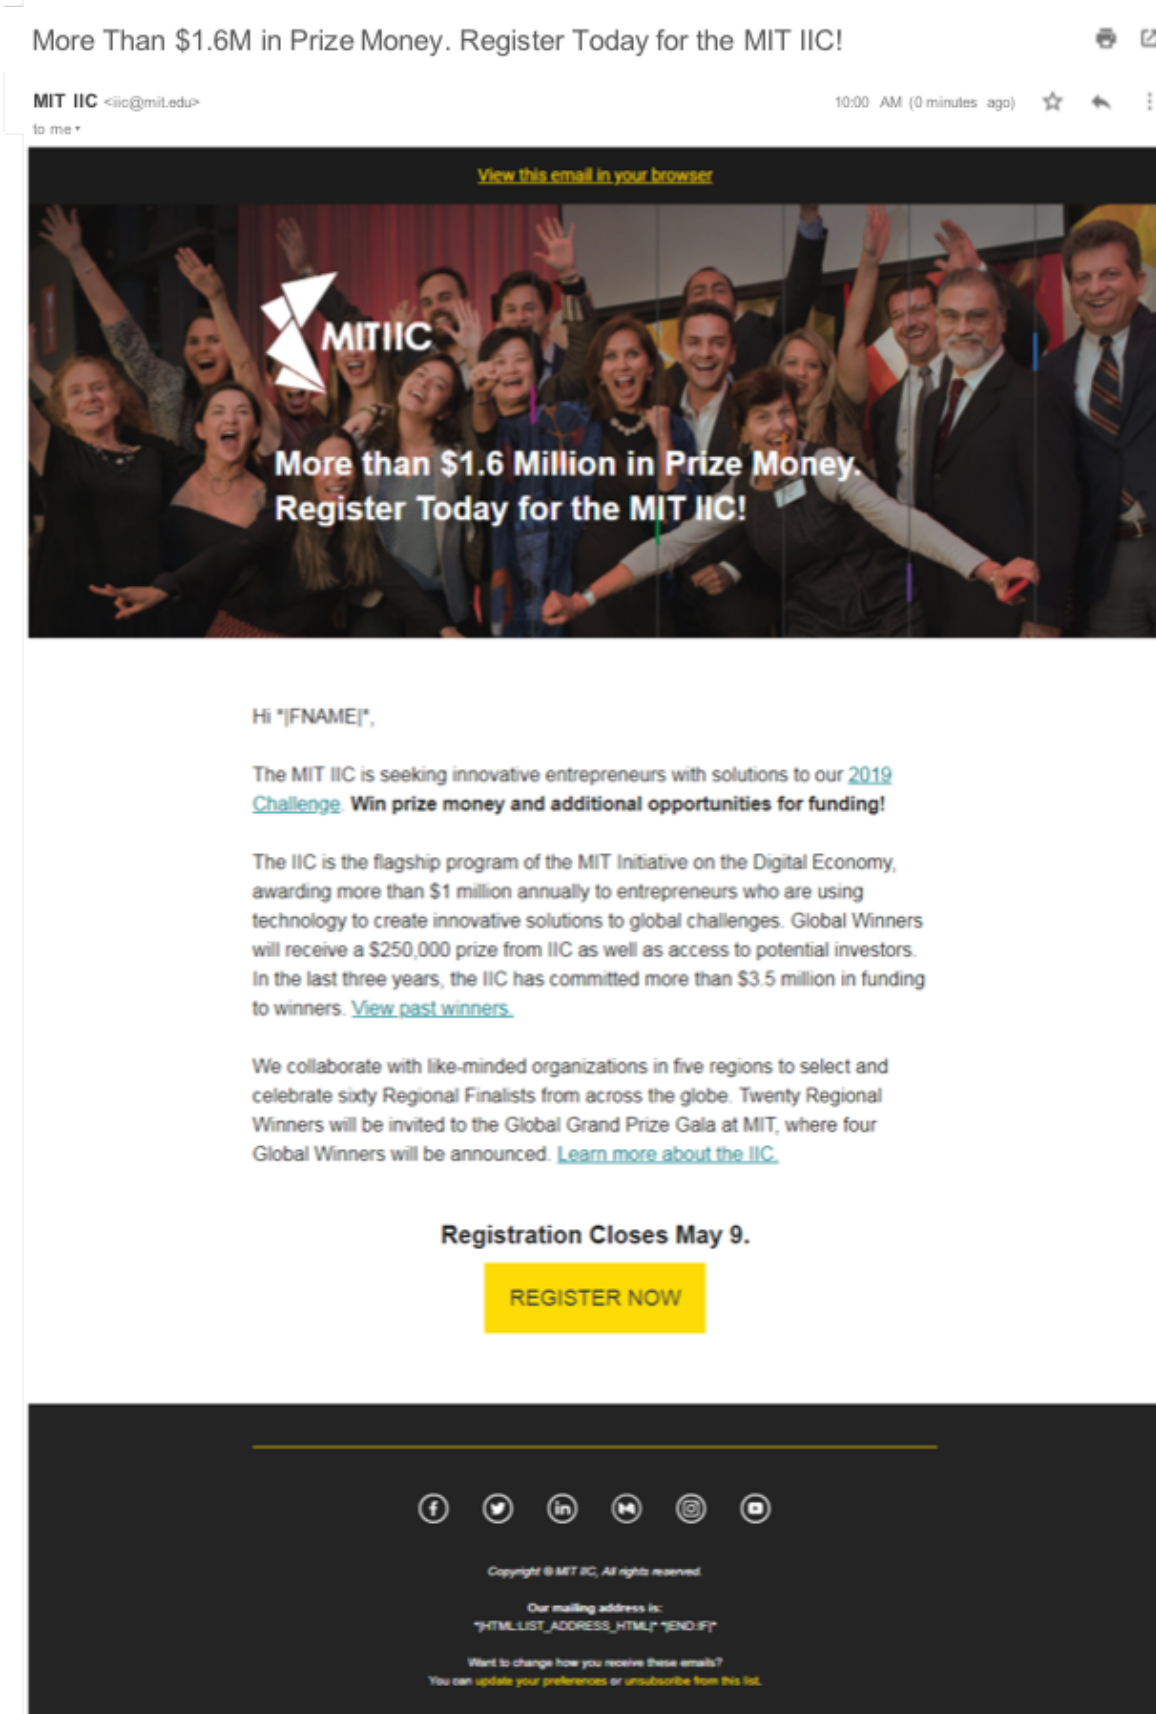

Figure A2: (b) Registration Stage Email Templates – Social Treatment

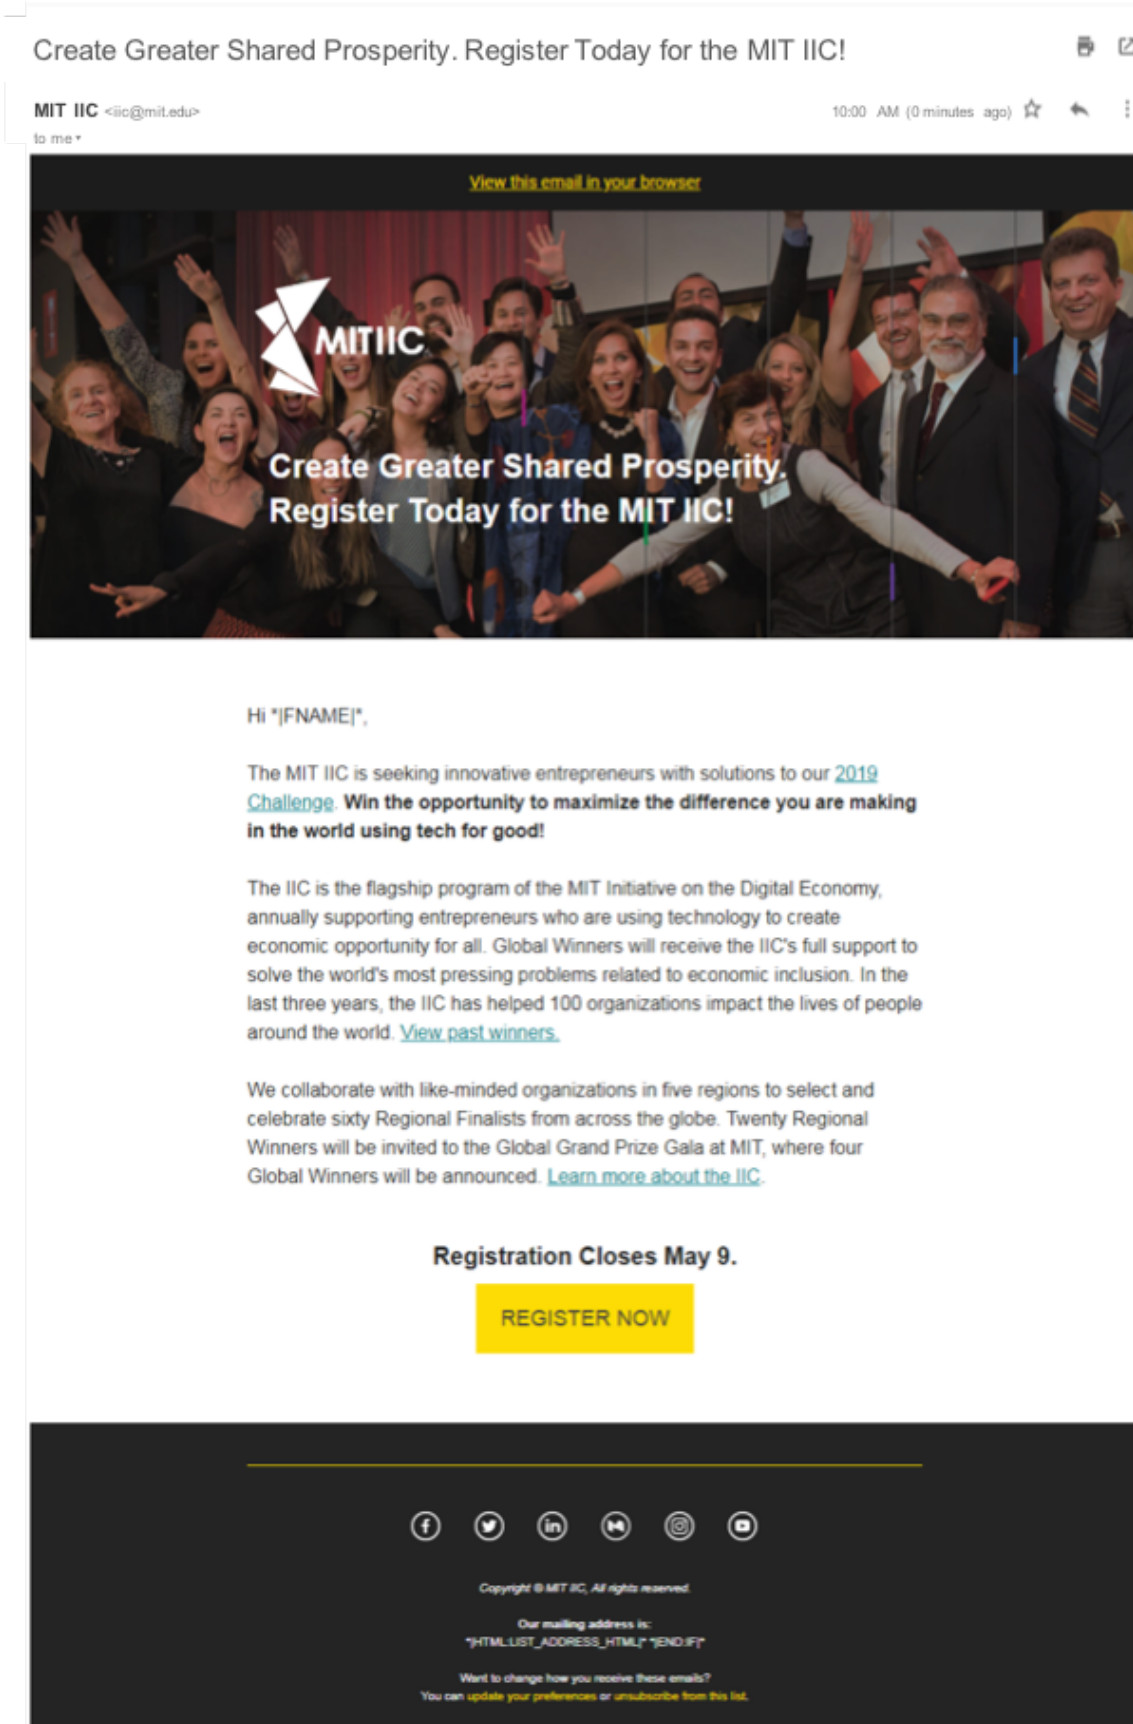

Figure A2: (c) Registration Stage Email Templates – Neutral Treatment

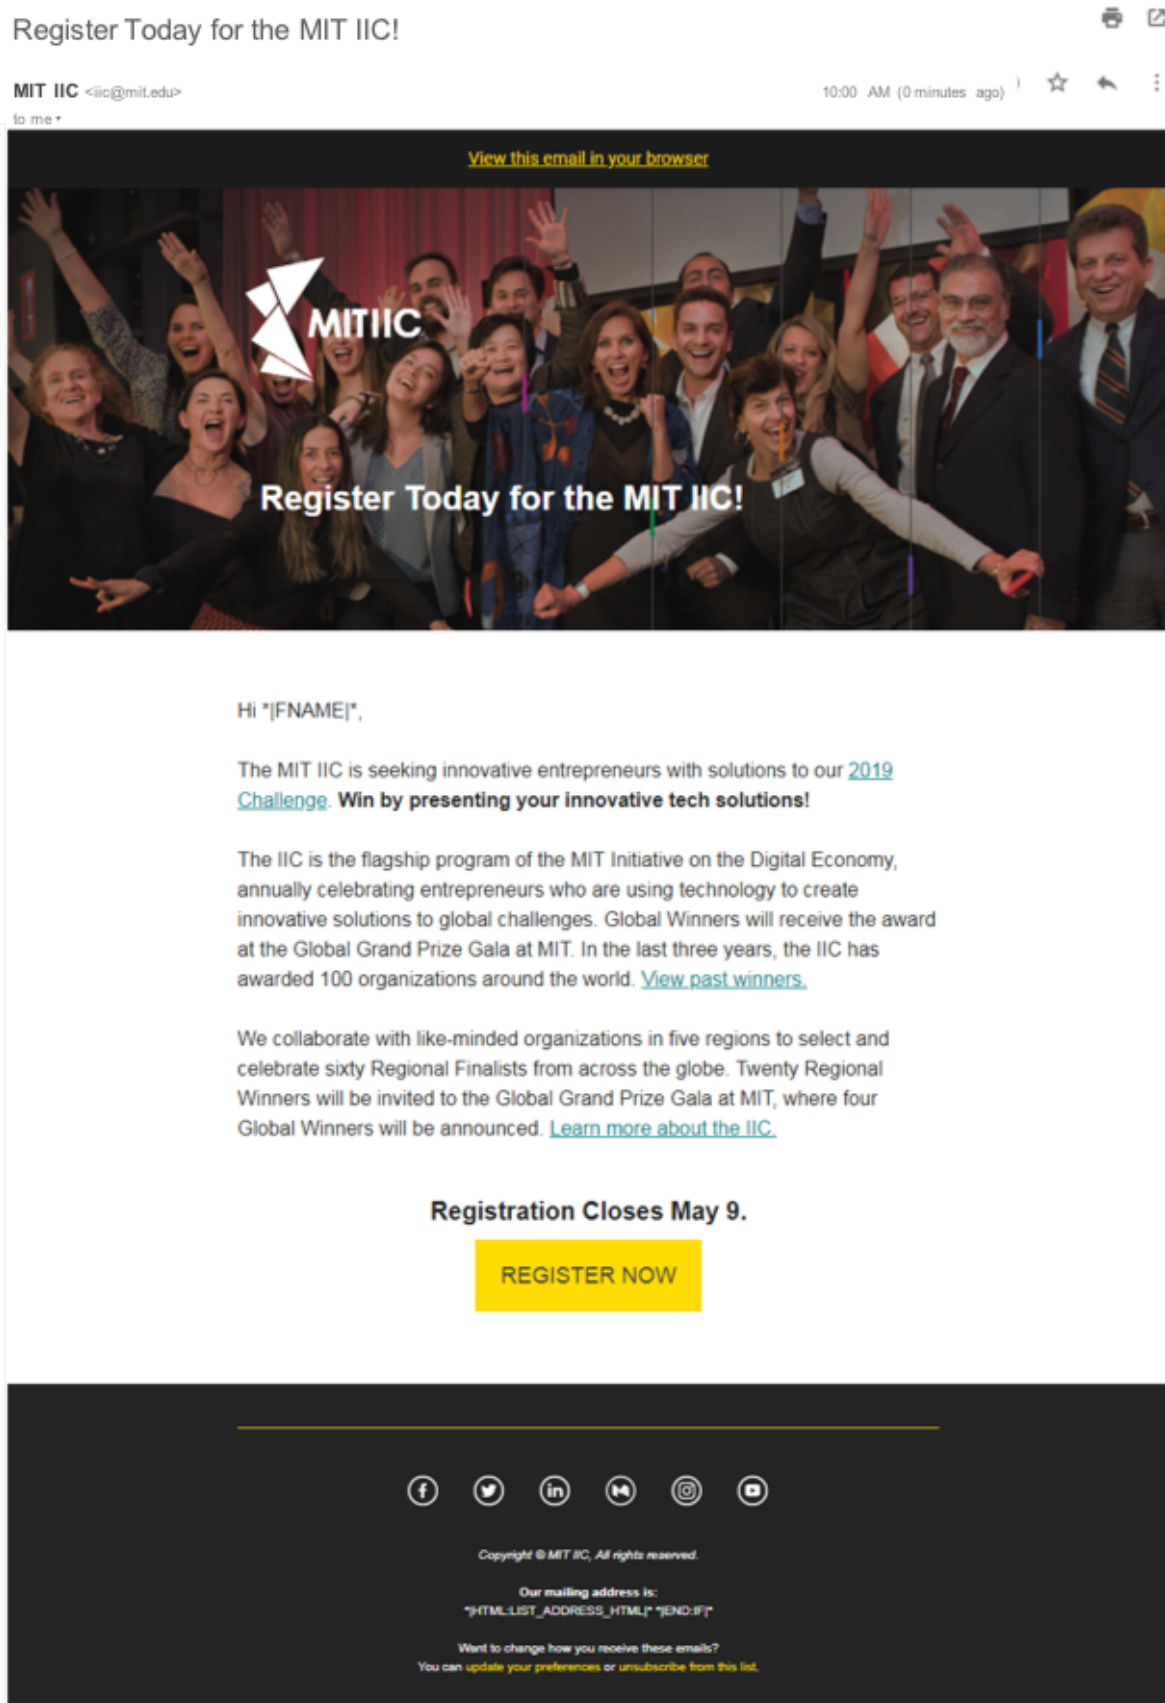

Figure A3: AngelList Email Template

---

## Inclusive innovators are changing the world



**MIT**  
INCLUSIVE  
INNOVATION  
CHALLENGE

MIT is accelerating the best future of work solutions on the planet. The MIT IIC has, once again, launched its premier competition for technology-oriented entrepreneurs looking for mentorship, financial support, and exposure.

Registration only takes a few minutes and closes May 9th.

[Learn more](#)

---

Figure A4: (a) Application Stage Email Templates Type 1 – Money Treatment

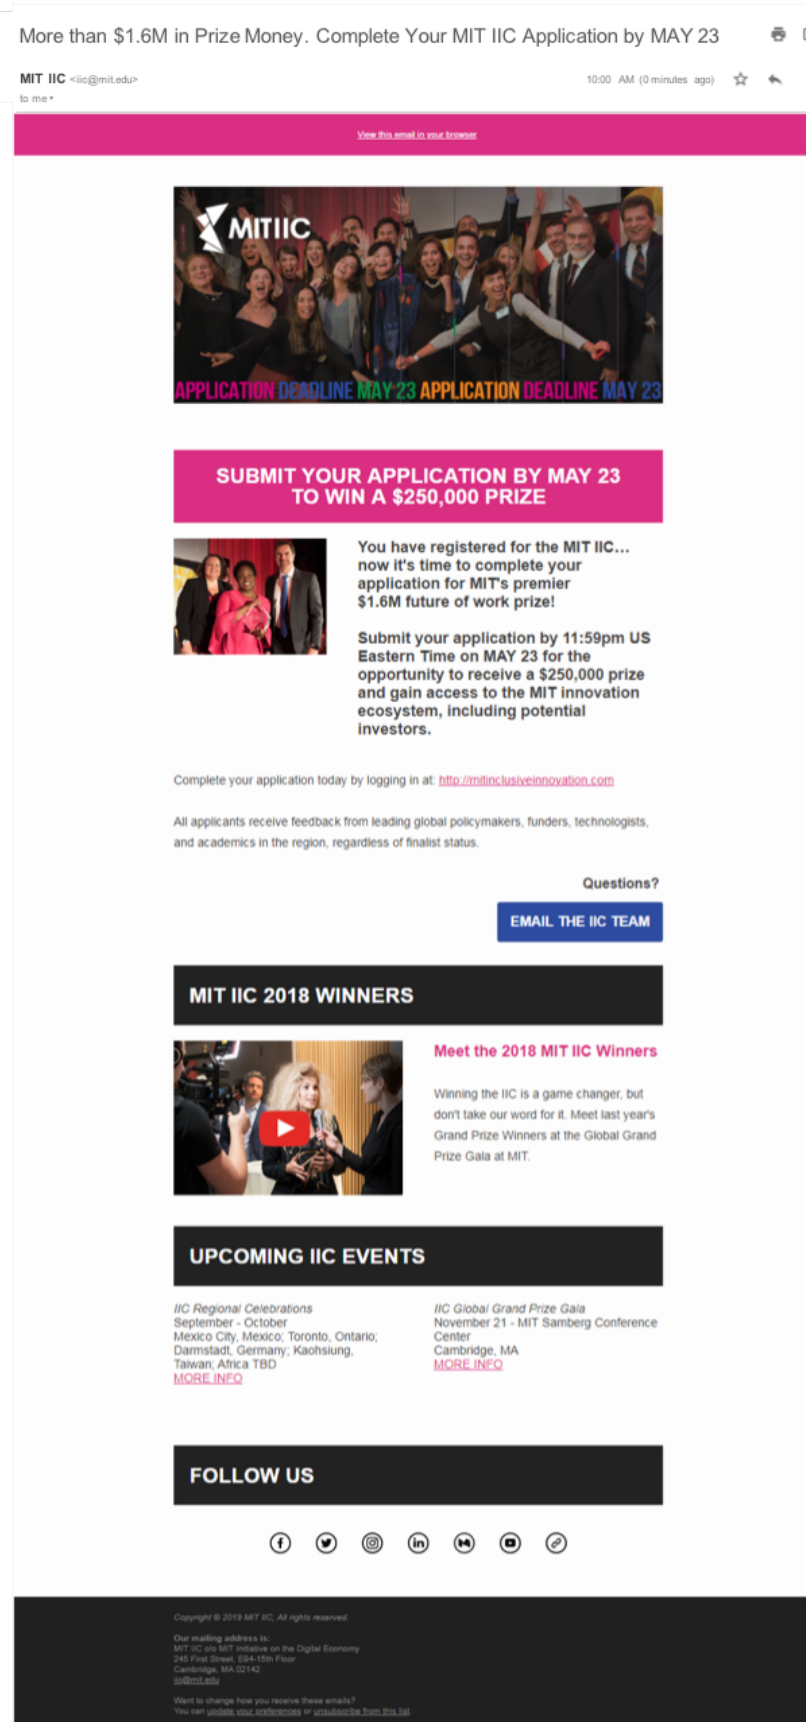

Figure A4: (b) Application Stage Email Templates Type 1 – Social Treatment

Create Greater Shared Prosperity. Complete Your MIT IIC Application by MAY 23

MIT IIC <iic@mit.edu> to me • 10:00 AM (0 minutes ago) ☆ ↶ ⋮

[View this email in your browser](#)



**APPLICATION DEADLINE MAY 23 APPLICATION DEADLINE MAY 23**

**SUBMIT YOUR APPLICATION BY MAY 23 TO MAXIMIZE YOUR SOCIAL IMPACT**



You have registered for the MIT IIC... now it's time to complete your application for MIT's premier future of work prize!

Submit your application by 11:59pm US Eastern Time on **MAY 23** for the opportunity to receive the IIC's support to increase your social impact and gain access to the MIT innovation ecosystem, including fellow change-making entrepreneurs.

Complete your application today by logging in at: <http://mitinclusioninnovation.com>

All applicants receive feedback from leading global policymakers, funders, technologists, and academics in the region, regardless of finalist status.

Questions?  
**EMAIL THE IIC TEAM**

**MIT IIC 2018 WINNERS**



**Meet the 2018 MIT IIC Winners**

Winning the IIC is a game changer, but don't take our word for it. Meet last year's Grand Prize Winners at the Global Grand Prize Gala at MIT.

**UPCOMING IIC EVENTS**

|                                                                                                                                                                                  |                                                                                                                                 |
|----------------------------------------------------------------------------------------------------------------------------------------------------------------------------------|---------------------------------------------------------------------------------------------------------------------------------|
| <i>IIC Regional Celebrations</i><br>September - October<br>Mexico City, Mexico, Toronto, Ontario, Darmstadt, Germany, Kaohsiung, Taiwan, Africa TBD<br><a href="#">MORE INFO</a> | <i>IIC Global Grand Prize Gala</i><br>November 21 - MIT Samberg Conference Center<br>Cambridge, MA<br><a href="#">MORE INFO</a> |
|----------------------------------------------------------------------------------------------------------------------------------------------------------------------------------|---------------------------------------------------------------------------------------------------------------------------------|

**FOLLOW US**

[f](#) [t](#) [@](#) [in](#) [v](#) [d](#) [e](#)

Copyright © 2019 MIT IIC. All rights reserved.  
Our mailing address is:  
MIT IIC and MIT Initiative on the Digital Economy  
240 First Street, ESA-15th Floor  
Cambridge, MA 02142  
iic@mit.edu  
Want to change how you receive these emails?  
You can update your preferences or unsubscribe from this list.

Figure A4: (c) Application Stage Email Templates Type 1 – Neutral Treatment

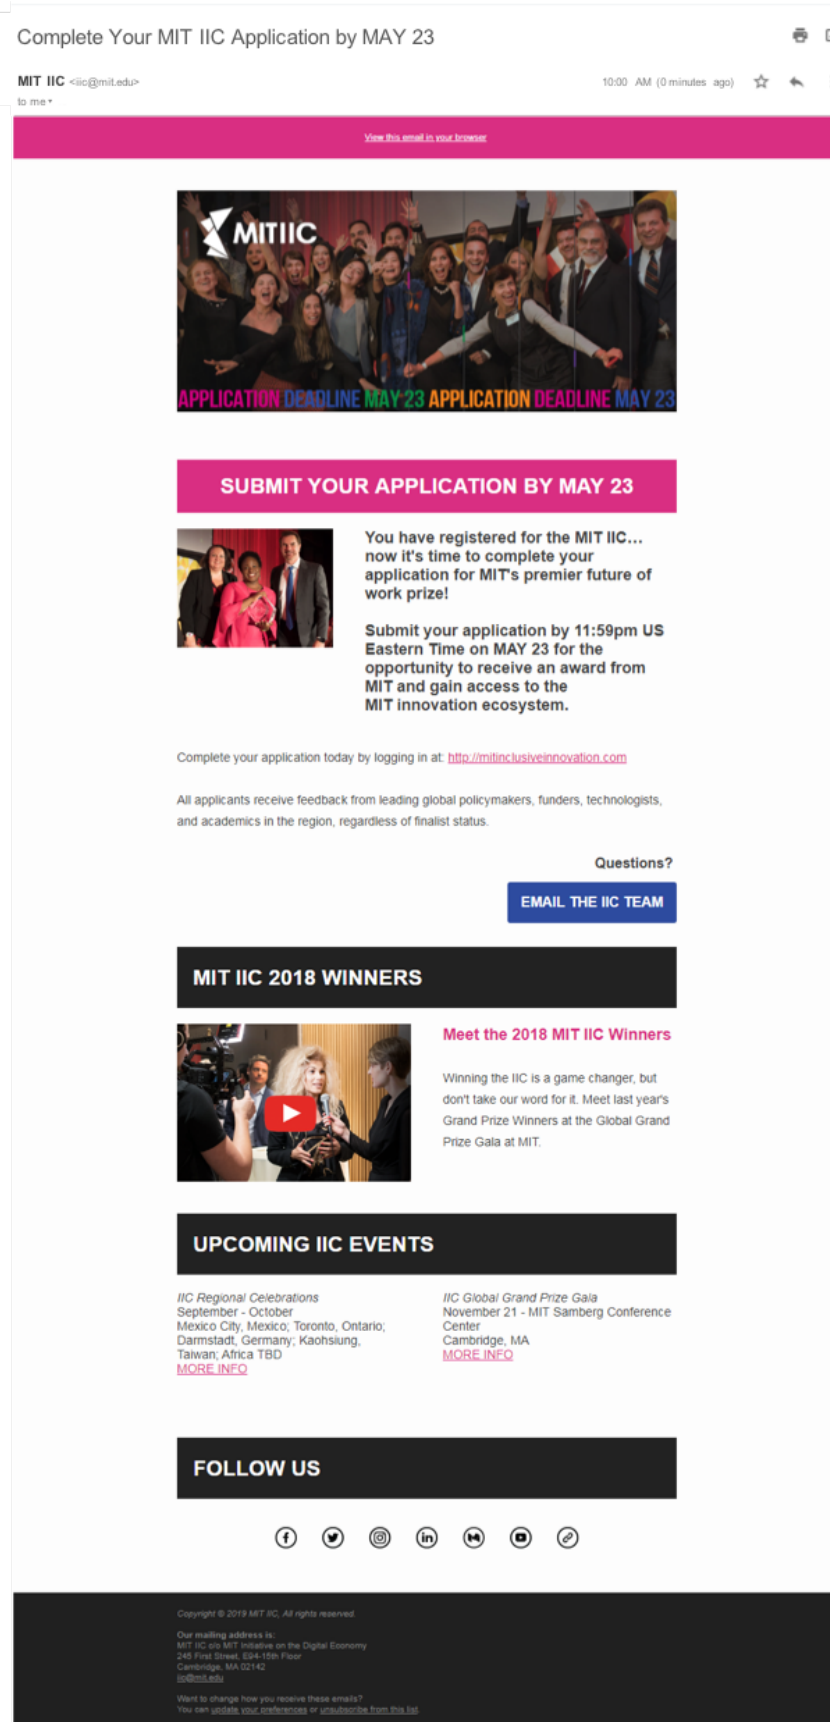

Figure A5: (a) Application Stage Email Templates Type 2 – Money Treatment

Don't Miss Your Chance to Win A \$250,000 Prize: MIT IIC Applications Due MAY 23

MIT IIC <iic@mit.edu> to me\* 10:00 AM (0 minutes ago)

View this email in your browser



### DON'T MISS YOUR CHANCE TO WIN A \$250,000 PRIZE



You've started your application. Now it is time to complete!

If selected as a Winner, you will receive up to a \$250,000 prize and gain access to the MIT innovation ecosystem including potential investors.

Finalize and submit your application by **MAY 23 (11:59pm US Eastern Time)**.

Complete your application today by logging in at: <http://mitinclusivinnovation.com>

All applicants receive feedback from leading global policymakers, funders, technologists, and academics in the region, regardless of finalist status.

Questions?

[EMAIL THE IIC TEAM](#)

### MIT IIC 2018 WINNERS



**Meet the 2018 MIT IIC Winners**

Winning the IIC is a game changer, but don't take our word for it. Meet last year's Grand Prize Winners at the Global Grand Prize Gala at MIT.

### UPCOMING IIC EVENTS

|                                                                                                                                                                                            |                                                                                                                                           |
|--------------------------------------------------------------------------------------------------------------------------------------------------------------------------------------------|-------------------------------------------------------------------------------------------------------------------------------------------|
| <p><i>IIC Regional Celebrations</i><br/>September - October<br/>Mexico City, Mexico, Toronto, Ontario, Darmstadt, Germany, Kaohsiung, Taiwan, Africa TBD<br/><a href="#">MORE INFO</a></p> | <p><i>IIC Global Grand Prize Gala</i><br/>November 21 - MIT Samberg Conference Center<br/>Cambridge, MA<br/><a href="#">MORE INFO</a></p> |
|--------------------------------------------------------------------------------------------------------------------------------------------------------------------------------------------|-------------------------------------------------------------------------------------------------------------------------------------------|

### FOLLOW US

Facebook, Twitter, Instagram, LinkedIn, YouTube, SoundCloud, RSS

Copyright © 2019 MIT IIC. All rights reserved.  
Our mailing address is:  
MIT IIC via MIT Initiative on the Digital Economy  
245 First Street, 6th-10th Floor  
Cambridge, MA 02142  
iic@mit.edu

Want to change how you receive these emails?  
You can always update your preferences or unsubscribe from this list.

Figure A5: (b) Application Stage Email Templates Type 2 – Social Treatment

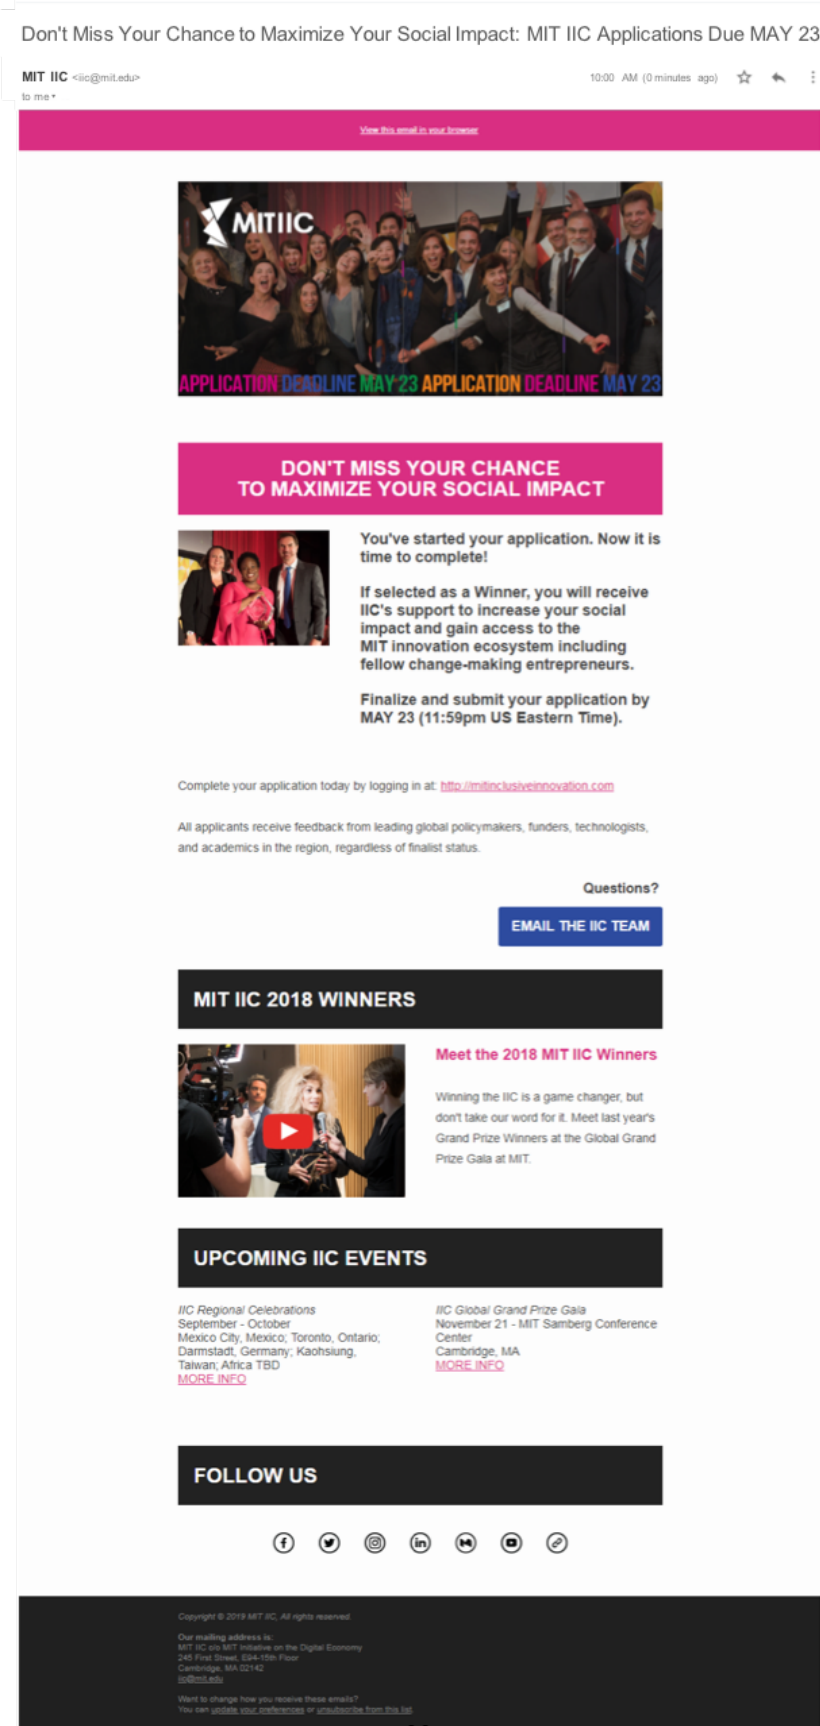

Figure A5: (c) Application Stage Email Templates Type 2 – Neutral Treatment

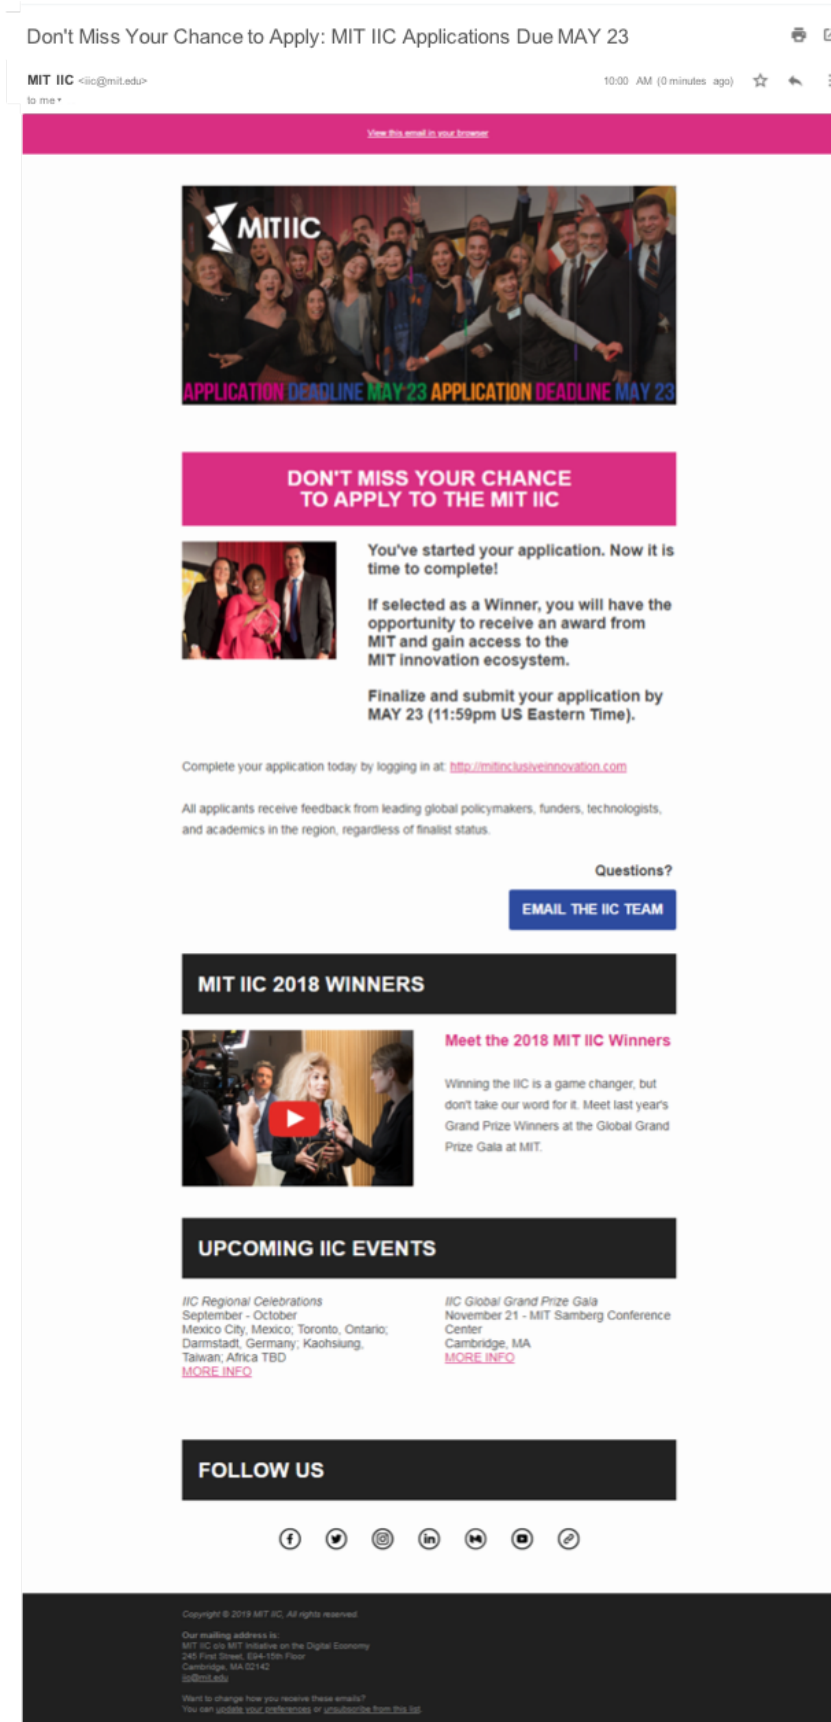

Figure A6: (a) Application Stage Email Templates Type 3 – Money Treatment

You Can't Win \$250,000 If You Don't Comp(lete)! MIT IIC Applications Due MAY 23

MIT IIC <iic@mit.edu> 10:00 AM (0 minutes ago) ☆ ↶ ⋮  
to me \*

[View this email in your browser](#)



Did you know that winners receive up to a \$250,000 prize and gain access to the MIT innovation ecosystem, including potential investors?



You're so close. Don't let this opportunity to win the money prize pass you by!

**Finalize and submit your application by 11:59pm US Eastern Time, MAY 23 at [MITinclusiveinnovation.com](https://MITinclusiveinnovation.com).**

All applicants receive feedback from leading global policymakers, funders, technologists, and academics in the region, regardless of finalist status.

Questions?  
[EMAIL THE IIC TEAM](#)

### MIT IIC 2018 WINNERS



**Meet the 2018 MIT IIC Winners**

Winning the IIC is a game changer, but don't take our word for it. Meet last year's Grand Prize Winners at the Global Grand Prize Gala at MIT.

### UPCOMING IIC EVENTS

|                                                                                                                                                                                                   |                                                                                                                                               |
|---------------------------------------------------------------------------------------------------------------------------------------------------------------------------------------------------|-----------------------------------------------------------------------------------------------------------------------------------------------|
| <p><i>IIC Regional Celebrations</i><br/>September - October<br/>Mexico City, Mexico; Toronto, Canada;<br/>Darmstadt, Germany; Kaohsiung,<br/>Taiwan; Africa TBD<br/><a href="#">MORE INFO</a></p> | <p><i>IIC Global Grand Prize Gala</i><br/>November 21 - MIT Samberg Conference<br/>Center<br/>Cambridge, MA<br/><a href="#">MORE INFO</a></p> |
|---------------------------------------------------------------------------------------------------------------------------------------------------------------------------------------------------|-----------------------------------------------------------------------------------------------------------------------------------------------|

### FOLLOW US

[f](#) [t](#) [@](#) [in](#) [v](#) [y](#) [s](#)

Copyright © 2019 MIT IIC. All rights reserved.  
Our mailing address is:  
MIT IIC c/o MIT Initiative on the Digital Economy  
245 First Street, E04-15th Floor  
Cambridge, MA 02142  
iic@mit.edu  
Want to change how you receive these emails?  
You can update your preferences or unsubscribe from this list.

Figure A6: (b) Application Stage Email Templates Type 3 – Social Treatment

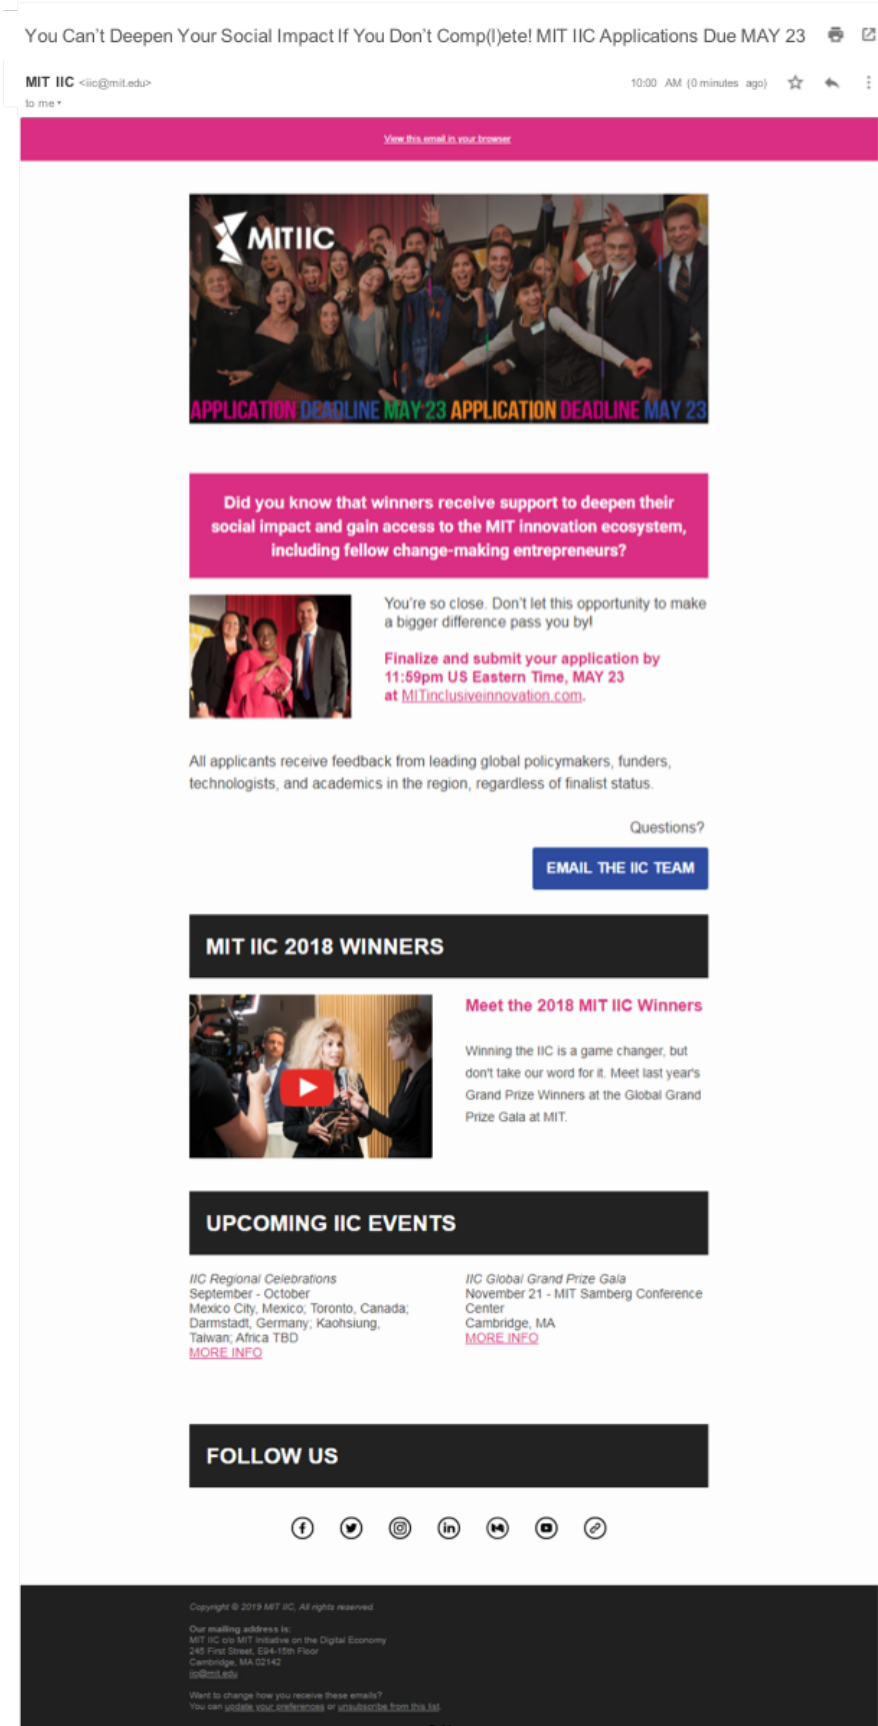

Figure A6: (c) Application Stage Email Templates Type 3 – Neutral Treatment

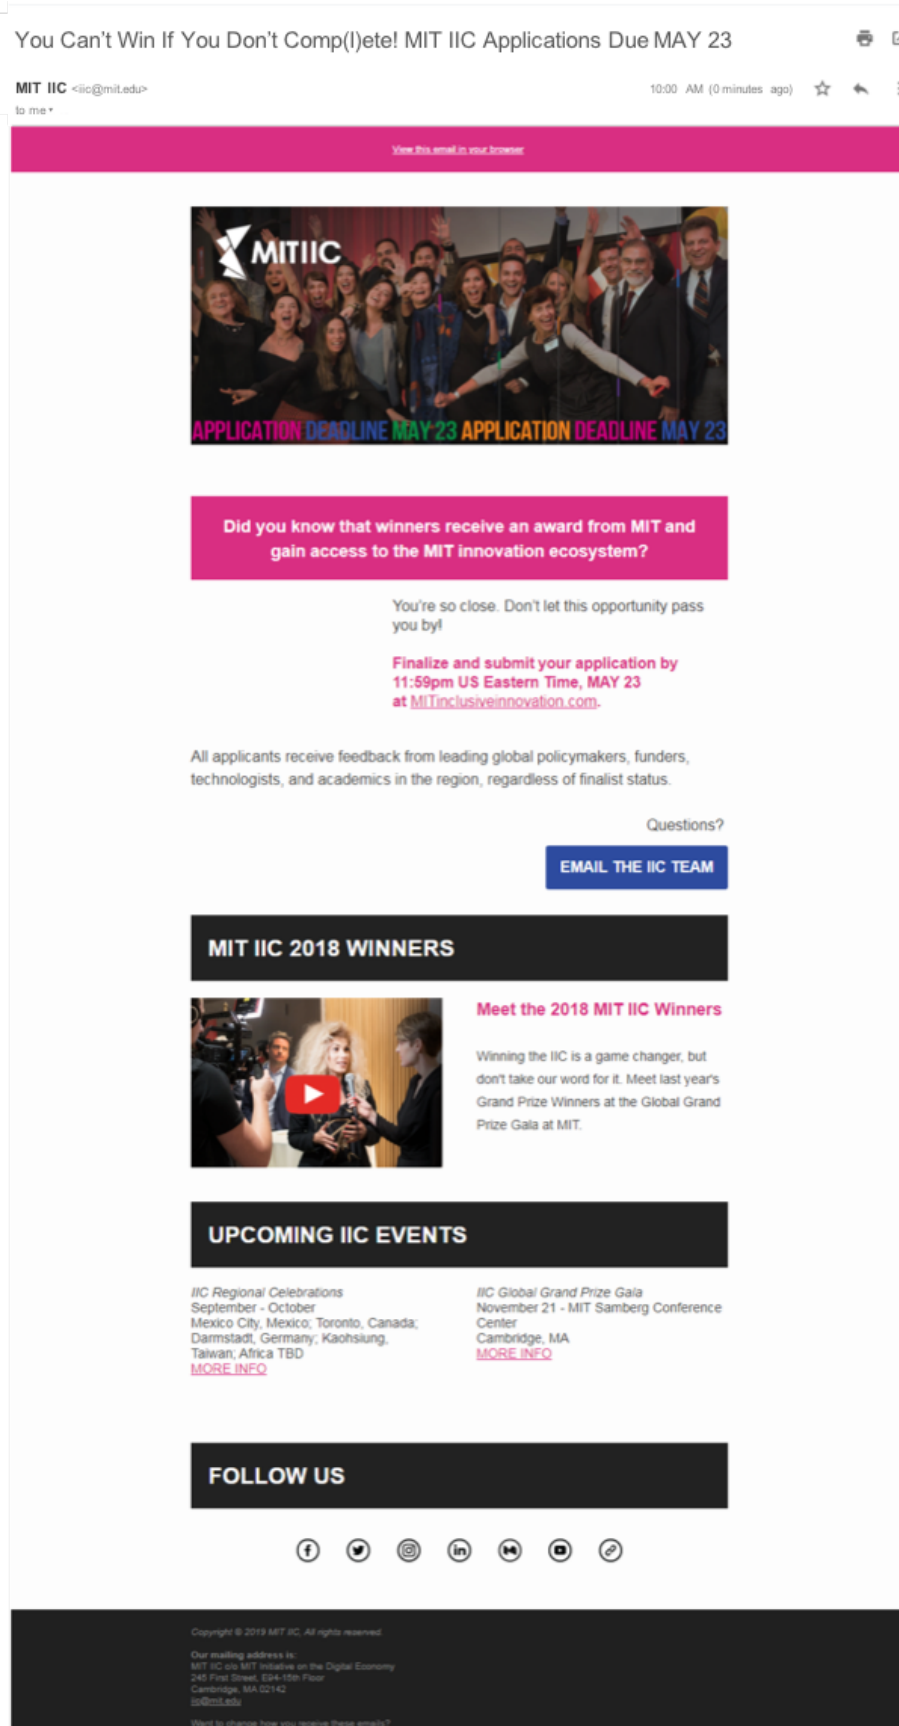

Figure A7: Registration Round – Extensive Margin by Gender

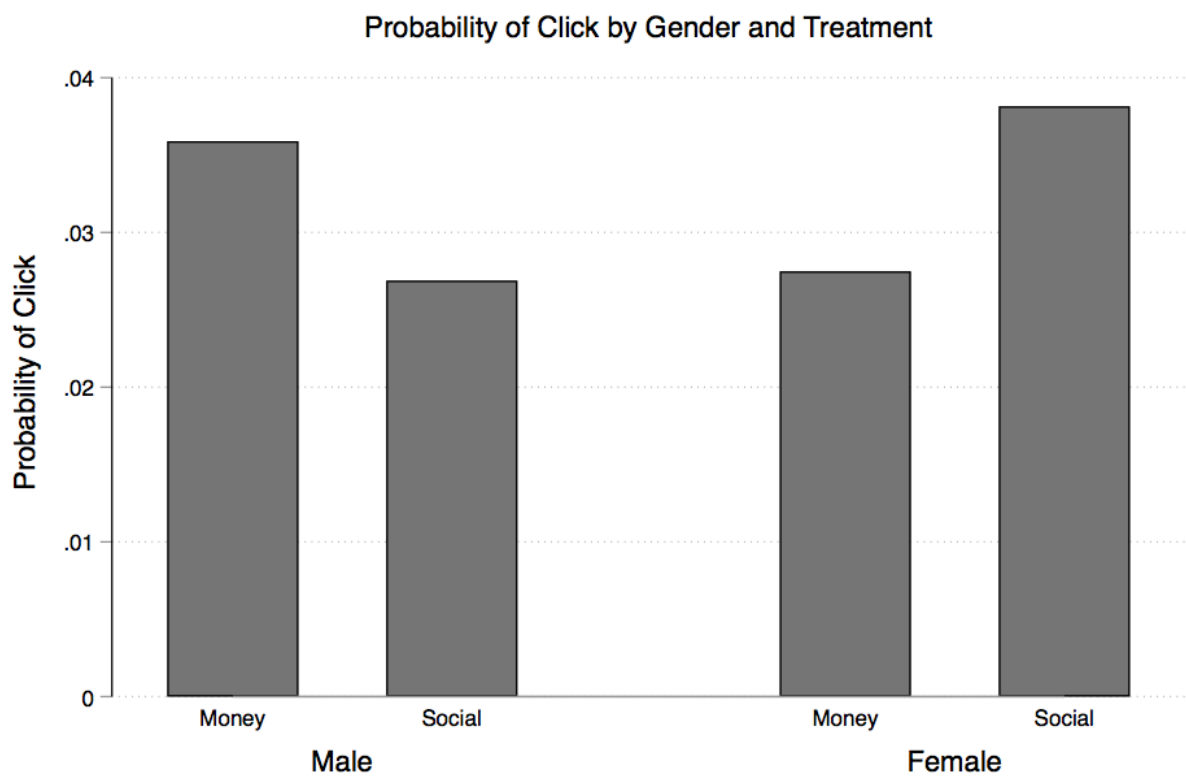

Supplement: mnsc.2020.3612.sm1.pdf [file mnsc.2020.3612.sm1.pdf]
